# Supplementary material for: SPE and LC-MS/MS determination of 14 illicit drugs in surface waters from the Natural Park of L’Albufera (València, Spain)
Source: Springer Nature journal article supplement (doi:10.1007/s00216-010-3720-x), 2010-04-30
Supplement: MOESM1 [file 216_2010_3720_MOESM1_ESM.doc]

**Liquid Chromatography –mass spectrometry in Food safety**

**SUPPLEMENTARY CONTENT**

**Ashok Kumar Malik1, Cristina Blasco and Yolanda Picó[[1]](#footnote-2)***

Laboratori de Nutrició i Bromatologia, Facultat de Farmàcia, Universitat de València, Av. Vicent Andrés Estellés s/n, 46100 Burjassot, Valencia, Spain

Table 1S.

MRLs and MRPLs established by the EU for several food contaminants in different matrices [61, 64-66]

| ***Compound*** | ***Matrix*** | ***MRPL***  **(μg kg-1)** |
| --- | --- | --- |
| ***Veterinary drugs*** |  |  |
| Chloramphenicol | Meat, eggs, milk, urine, aquaculture products, honey | 0.3 |
| Nitrofuran metabolitesa | Poultry meat | 1 |
| Aquaculture products |
| Medroxyprogesterone acetate | Pig kidney fat | 1 |
| Sum of malachite green and leucomalachite green | Meat of aquaculture products | 2 |
| ***Compound*** | ***Matrix*** | ***MRL***  **(μg kg-1)** |
| ***Agrochemicals*** |  |  |
| **Acephate** | Fruit fresh or frozen, nuts, vegetables fresh or frozen, pulses dry, oilseeds and oil fruits, cereals, sugar plants, products of animal origin (terrestrial animals) | 0.02 |
| Spices | 0.2 |
| HOPS (dried) , including hop pellets and unconcentrated powder | 0.05 |
| Tea, coffee, herbal infusions and cocoa | 0.05-1 |
| **Carbendazim*b*** | Citrus fruits, plums, wine grapes, cherries, mangoes, tomatoes, aubergines, Brussels sprouts | 500 |
| Loquat, okra | 2000 |
| Cultivated (Common mushroom, Oyster mushroom, Shi-take), honey | 1000 |
| Table grapes | 300 |
| Pome fruits, papaya, Beans (with pods) (Green bean (french beans, snap beans), scarlet runner bean, slicing bean, yardlong beans), Peas (with pods) (Mangetout (sugar peas)) | 200 |
| Nut trees, stone fruits, strawberries, canned fruits, other small fruits or berry, miscellaneous fruits, pulses dry, oilseed and oil fruits, sugar plants, hops, tea, coffee, herbal infusions, cocoa, rye, wheat | 100 |
| PRODUCTS OF ANIMAL ORIGIN-TERRESTRIAL ANIMALS | 50 |
| Buckweat, maize and other cereals | 10 |
| **Carbaryl** | Fruit fresh or frozen fruits, vegetables fresh or frozen, pulse dry, oil seeds and oil fruits, products of animal origin | 50 |
| Coffee, tea, herbal infusions, cocoa, hops, spices | 100 |
| Tomatoes, cereals | 500 |
| Loquat, Azarole (mediteranean medlar), Rose hips, Mulberries, Elderberries (Black chokeberry (appleberry), mountain ash, azarole, buckthorn (sea sallowthorn), hawthorn, service berries, and other treeberries), carambola, Jambulan, Pickly pear, star apple, american persimon, Bread fruit (Jackfruit), Durian , Soursop (guanabana), casaba, arrowroot, Land cress, Red mustard, rice | 1000 |
| Purslane (Winter purslane (miner’s lettuce), garden purslane, common purslane, sorrel, glassworth) | 3000 |
| Table olives | 5000 |
| **Fenthion*c*** | Citrus fruits | 3000 |
| Loquat, table olives, olives for oil production | 1000 |
| Cherries | 2000 |
| Tea, coffee, herbal infusions, cocoa, hops, spices | 100 |
| PRODUCTS OF ANIMAL ORIGIN-TERRESTRIAL ANIMALS | 50 |
| Fruits fresh or frozen, nuts, vegetables fresh or frozen, cereals, Milk and cream, not concentrated, nor containing added sugar or sweetening matter, butter and other fats derived from milk, cheese and curd, Birds’ eggs, fresh preserved or cooked Shelled eggs and egg yolks fresh, dried, cooked by steaming or boiling in water, moulded, frozen or otherwise preserved whether or not containing added sugar or sweetening matter | 10 |
| ***Veterinary drugs*** |  |  |
| **Amoxycillin** | All food producing species  (Muscle, fat, liver, kidney) | 50 |
| Milk | 4 |
| **Cefalexin** | Bovine  (muscle, fat, liver, milk) | 200 |
| Bovine  (kidney) | 1000 |
| **Enrofloxacin*d*** | Bovine, rabbits, porcine, poultry, ovine, (muscle, fat), Milk (only bovine) | 100 |
| Bovine and ovine, (liver) | 300 |
| Bovine and ovine, (kidney) | 200 |
| rabbits, porcine, poultry, (liver) | 200 |
| rabbits, porcine, poultry, (kidney) | 300 |
| **Lyncomycin** | Bovine, ovine, porcine, chicken (muscle) | 100 |
| Bovine, ovine, porcine, chicken (fat) | 50 |
| Bovine, ovine, porcine, chicken (liver) | 500 |
| Bovine, ovine, porcine, chicken (kidney) | 1500 |
| Bovine, ovine (milk) | 150 |
| **Oxytetracycline*e*** | All food species (muscle, milk) | 100 |
| All food species (liver) | 300 |
| All food species (kidney) | 600 |
| All food species (eggs) | 200 |
| **Penethamate** | Bovine, porcine (muscle, fat, liver kidney) | 50 |
| Bovine (milk) | 4 |
| **Thiamphenicol** | Bovine and chicken (muscle, fat, liver, kidney, milk, eggs) | 50 |
| ***Mycotoxins*** |  |  |
| **Aflatoxins** | Groundnuts to be subjected to sorting, or other physical treatment, before human consumption or use as an ingredient in foodstuffs | 8.0f, 15.0g |
|  | Dried fruit and processed products thereof, intended for direct human consumption or use as an ingredient in foodstuffs | 2.0f, 4.0g |
|  | Raw milk, heat-treated milk and milk for the manufacture of milk-based products | 0.05h |
|  | Processed cereal-based foods and baby foods for infants and young children | 0.01f |
| **Ochtatoxin A** | Dried vine fruit (currants, raisins and sultanas) | 10 |
|  | Dietary foods for special medical purposes intended specifically for infants | 0.5 |
| **Patulin** | Fruit juices, concentrated fruit juices as reconstituted and fruit nectars | 50 |
|  | Apple juice and solid apple products, including apple compote and apple puree, for infants and young  children and labelled and sold as such | 10 |
| **Deoxynivalenol** | Unprocessed maize, with the exception of unprocessed maize intended to be processed by wet milling | 1750 |
|  | Processed cereal-based foods and baby foods for infants and young children | 200 |
| **Fumonisinsi** | Unprocessed maize, with the exception of unprocessed maize intended to be processed by wet milling | 4000 |
|  | Processed maize-based foods and baby foods for infants and young children | 200 |

aNitrofuran metabolites (furazolidone, furaltadone, nitrofurantoin, nitrofurazone)

bCarbendazim and benomyl (sum of benomyl and carbendazim expressed as carbendazim) (R)

cFenthion (fenthion and its oxigen analogue, their sulfoxides and sulfone expressed as parent) (F)

dSum of enrofloxacin and ciprofloxacin

eSum of parent drug and its 4-epimer

fAflatoxin B1

gAflatoxins as Sum of B1, B2, G1 and G2

hAflatoxin M


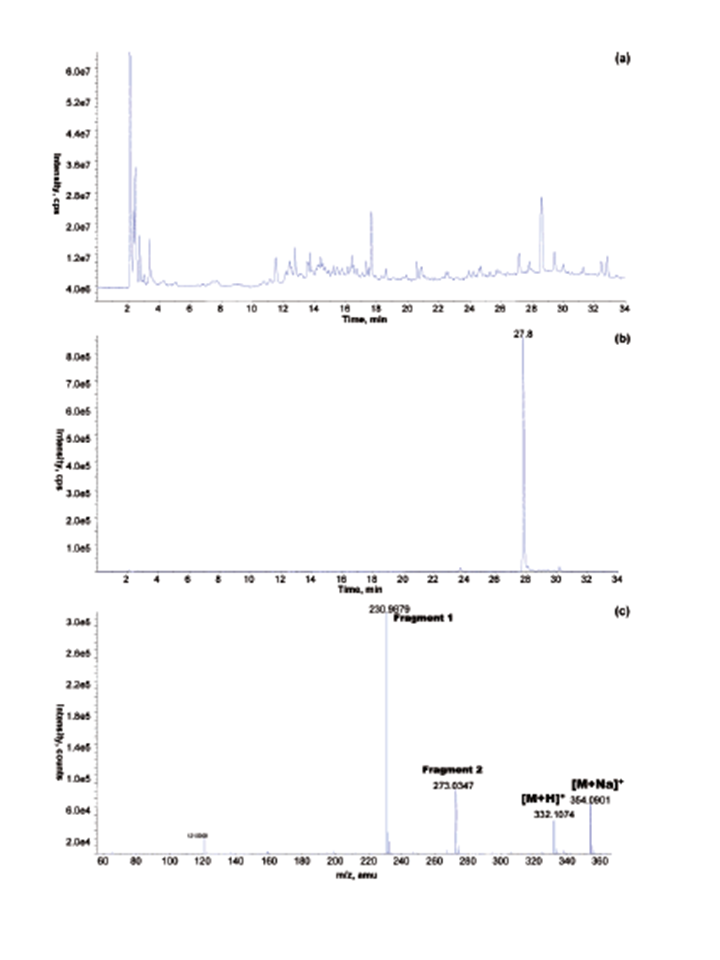


Fig. 1S. (a) Total ion chromatogram corresponding to the LC-TOF-MS analysis of a pepper extract. Retrospective examination and analysis of this sample revealed the presence of banned isofenphos-methyl (0.071 mg kg-1) at 27.8 min; (b) extracted ion chromatogram of the detected species used for quantitation purposes (m/z 230.98 ( 0.01 Da); and (c) accurate mass spectrum of isofenphos-methyl in the studied sample. Reproduced with permission from [101] copyright © 2007 American Chemical Society.


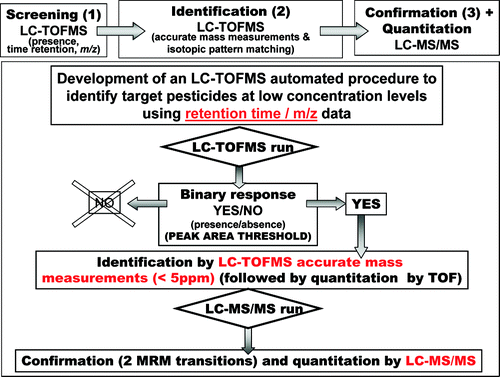


Fig. 2S Proposed workflow for the screening, identification, confirmation, and quantitation of target pesticides in vegetable samples. The approach consists of three steps: (1) screening by LC−TOFMS with retention time/accurate mass m/z windows; (2) identification via accurate mass measurements (<5 ppm error); and (3) confirmation (2 MRM transitions) and quantitation by LC−MS/MS. Reproduced with permission from [101] copyright © 2007 American Chemical Society.


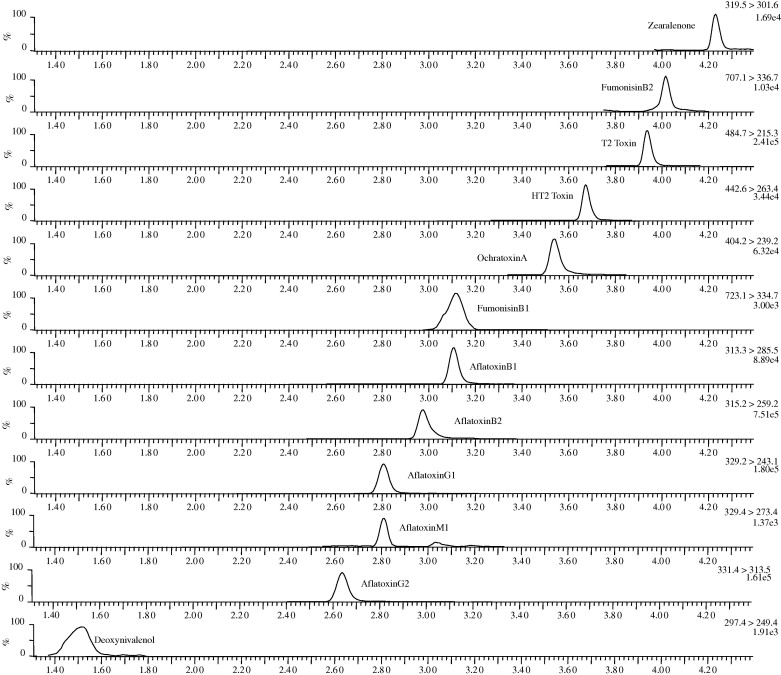


Fig. 3S. UPLC–MS/MS chromatograms obtained from a blank maize sample spiked at 25 µg/kg (2.5 µg/kg for aflatoxin M1). Reproduced with permission from [148] copyright © 2009 Elsevier B.V.


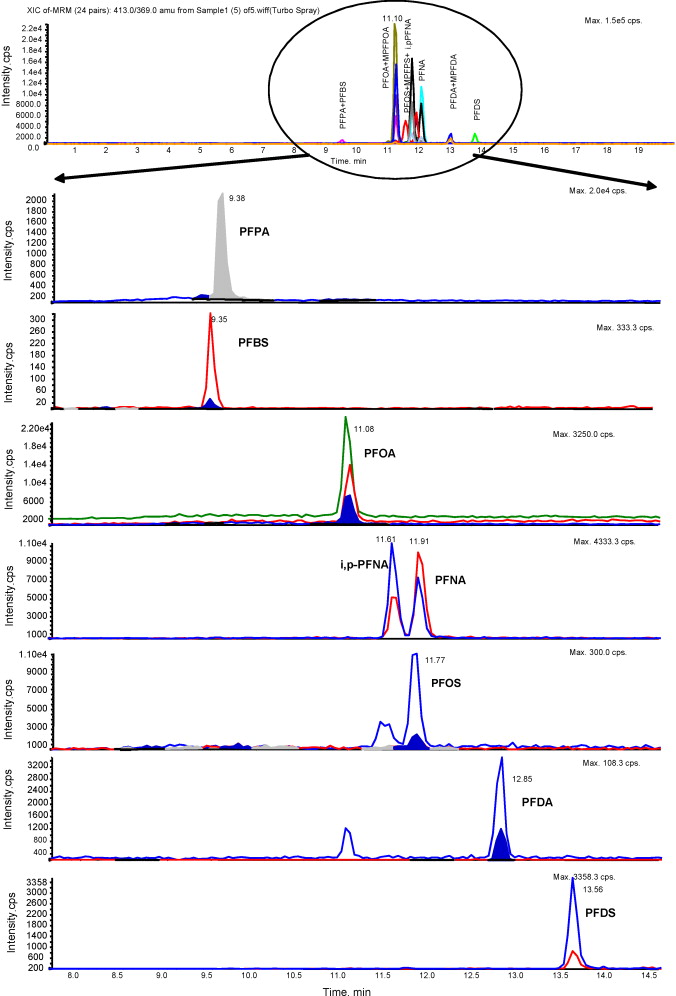


Fig. 4S. Extracted ion chromatograms showing the monitored SRM transitions for the studied PFCs in a spiked anchovy sample at 0.05 μg kg−1. The most intense is the one used for quantification, the other for confirmation of the compound. Peak identification: MPFOA = perfluoro-n-[1,2,3,413C4]octanoic acid, MPFOS = perfluoro-1-[1,2,3,413C4]octanesulfonate MPFDA = perfluoro-n-[1,213C2]decanoic acid, PFBS = perfluorobutane sulfonate, PFDA = perfluorodecanoic acid, PFDS = perfluorodecano sulfonate, i,p-PFNA = perfluoro-7-methyloctanoic acid, PFNA = perfluorononaoic acid, PFOA = perfluoroctanoic acid, PFOS = perfluorooctane sulfonate, PFPA = pentafluorobutiric acid. Reproduced with permission from [24] copyright © 2009 Elsevier B.V.


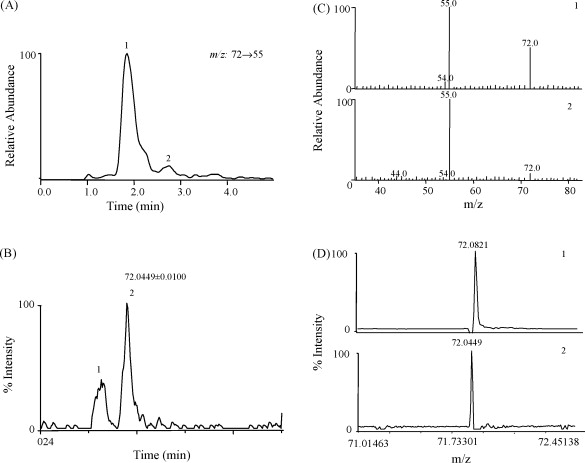


Fig 5S. LC–APCI–MS chromatograms and spectra of a potato crisp sample obtained using: (A) linear trap, product ion scan; (B) time-of-flight, MS acquisitionmode; (C) linear trap, product ion spectra; (D) time-of-flight, spectra. (1) Interfering peak and (2) acrylamide. Reproduced with permission from [183] copyright © 2008 Elsevier B.V.

As an example, Fig. 5S A shows the chromatogram corresponding to a potato crisp sample where the intensity of the interfering peak is particularly important. Tandem mass spectrometry could not solve this problem because both acrylamide and the interfering compound have the same precursor and product ions (Fig. 5S C). In order to identify the interfering peak, different strategies based on the use of the IT and TOF instruments were performed. The use of accurate mass measurements on a TOF instrument and the multistep mass spectra obtained in an IT (MS2, MS3) unambiguosly showed that an interfering co-extracted compound present in some potato products was valine.

1. *Corresponding author. Tel.: +34 963543092; fax: + 34 96 3544954

   E-mail: [Yolanda.Pico@uv.es](mailto:Yolanda.Pico@uv.es)

   1 On leave from: Ch. Devil Lal University, Sirsa, Haryana, India [↑](#footnote-ref-2)
